# Supplementary material
Source: MDPI journal article supplement (https://www.mdpi.com/1999-4907/13/11/1922)
Supplement: s1 [file s1]

Article

# Studies of the photo protection of radiata pine wood using photocatalytic nanoparticles

Vicente A. Hernandez<sup>1,2\*</sup>, Romina Romero<sup>3\*</sup>, Nicole Sagredo<sup>2</sup>, Phil D. Evans<sup>4</sup>, David Contreras<sup>3</sup>

<sup>1</sup> Facultad de Ciencias Forestales, Departamento de Manejo de Bosques y Medio Ambiente, Universidad de Concepción, Victoria 631, Concepción 40730386, Chile

<sup>2</sup> Centro de Biotecnología, Universidad de Concepción, Barrio Universitario S/N, Concepción 40730386, Chile

<sup>3</sup> Facultad de Ciencias Químicas, Departamento de Química Analítica e Inorgánica, Universidad de Concepción, Edmundo Larenas 129, Concepción 4070371, Chile

<sup>4</sup> Department of Wood Science, Faculty of Forestry, University of British Columbia, 2424 Main Mall, Vancouver, BC V6T 1Z4, Canada

\* Correspondence: vhernandezc@udec.cl (V.A.H.); rominaromero@udec.cl (R.R.); Tel.: +56-41-2661449 (V.A.H.)

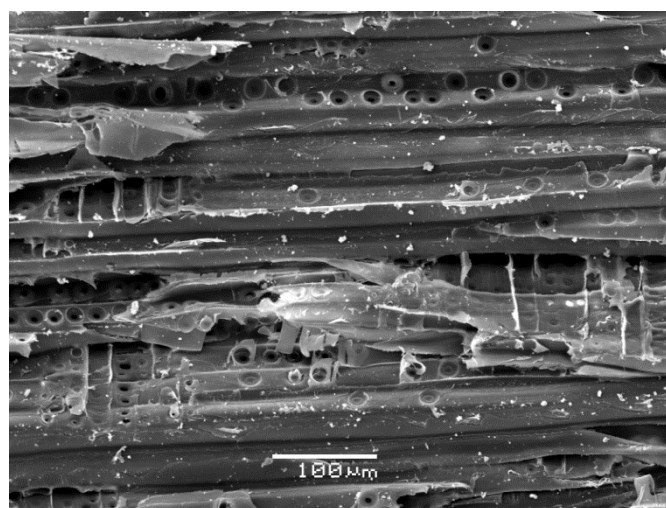

Figure S1: SEM image showing nanoparticles inside wood after vacuum-assisted impregnation.

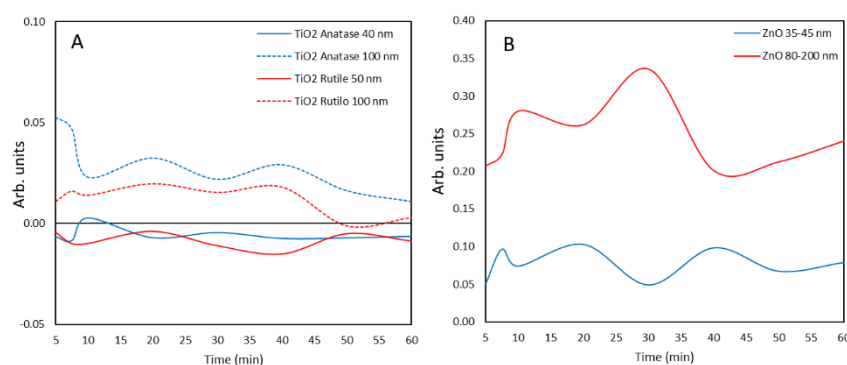

Figure S2: Intensity of  $\cdot\text{OH}$  radicals in arbitrary unit (Arb. unit) by using DMPO-OH adduct. (A) TiO<sub>2</sub> and (B) ZnO nanoparticles.

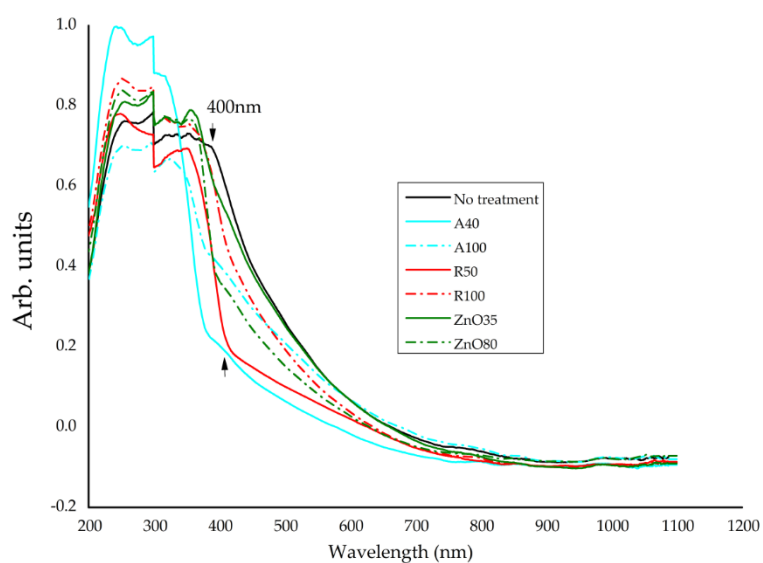

Figure S3: UV-Vis absorbance between 200–1100 nm of untreated control and NP treated samples.

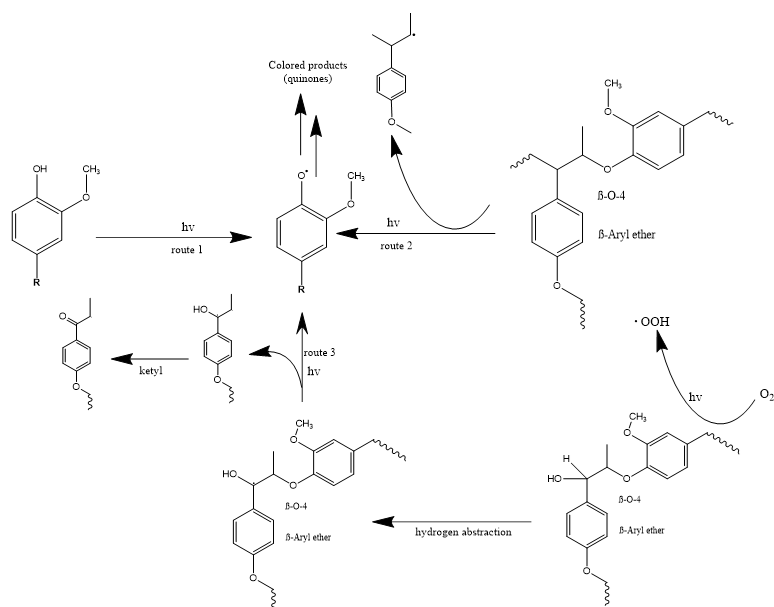

Figure S4: Summary of the main pathways reported in the formation of phenoxy radicals in lignin (modified from Fabbri et al. 2005).
